# Supplementary material
Source: Springer Nature journal article supplement (https://www.springermedizin.de/resource/supplementary/12879_2009_1315_MOESM2_ESM.pdf/9442328)
Supplement: MOESM2 [file 9442328]

15Y3M.F.2571461  
3-72  
-59 mm  
ACCUPAQUE 300  
Acc# 0700138208  
Patient Pos: FFS

GE MEDICAL SYSTEMS LightSpeed VCT  
21 nov. 2007 16:28:52 3-125  
100kV, 1mAs -112 mm  
SC 500 mm ACCUPAQUE 300  
SW 1.25 mm Acc# 0700138208  
Study Desc: CT THORAX Patient Pos: FFS

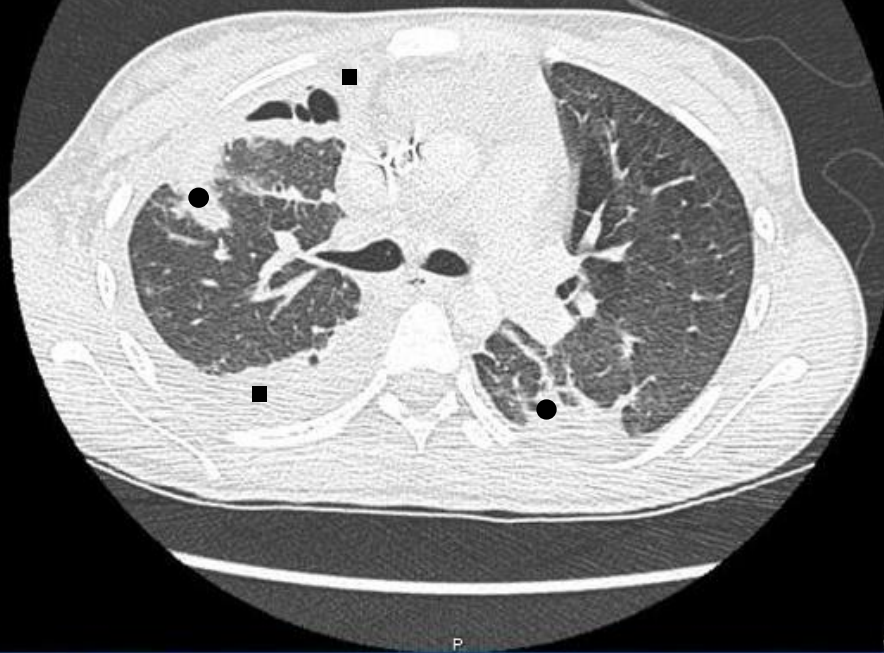

C -600  
W 1600

GE MEDICAL SYSTEMS LightSpeed VCT  
21 nov. 2007 16:28:46  
100kV, 1mAs  
SC 500 mm  
SW 1.25 mm  
Study Desc: CT THORAX

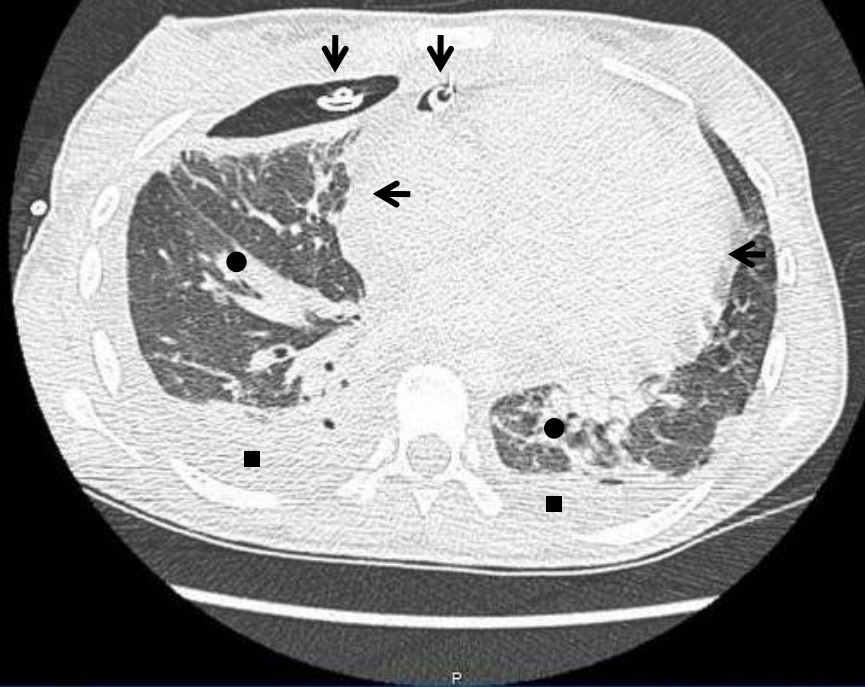

C -600  
W 1600
